# Supplementary material for: Calibration of Low-Cost Particulate Matter Sensors PurpleAir: Model Development for Air Quality under High Relative Humidity Conditions
Source: Copernicus journal article supplement (doi:10.5194/egusphere-2024-1142), 2024-05-02
Supplement: Supplementary file 1 [file egusphere-2024-1142-supplement.pdf]

## SUPPLEMENTAL MATERIAL

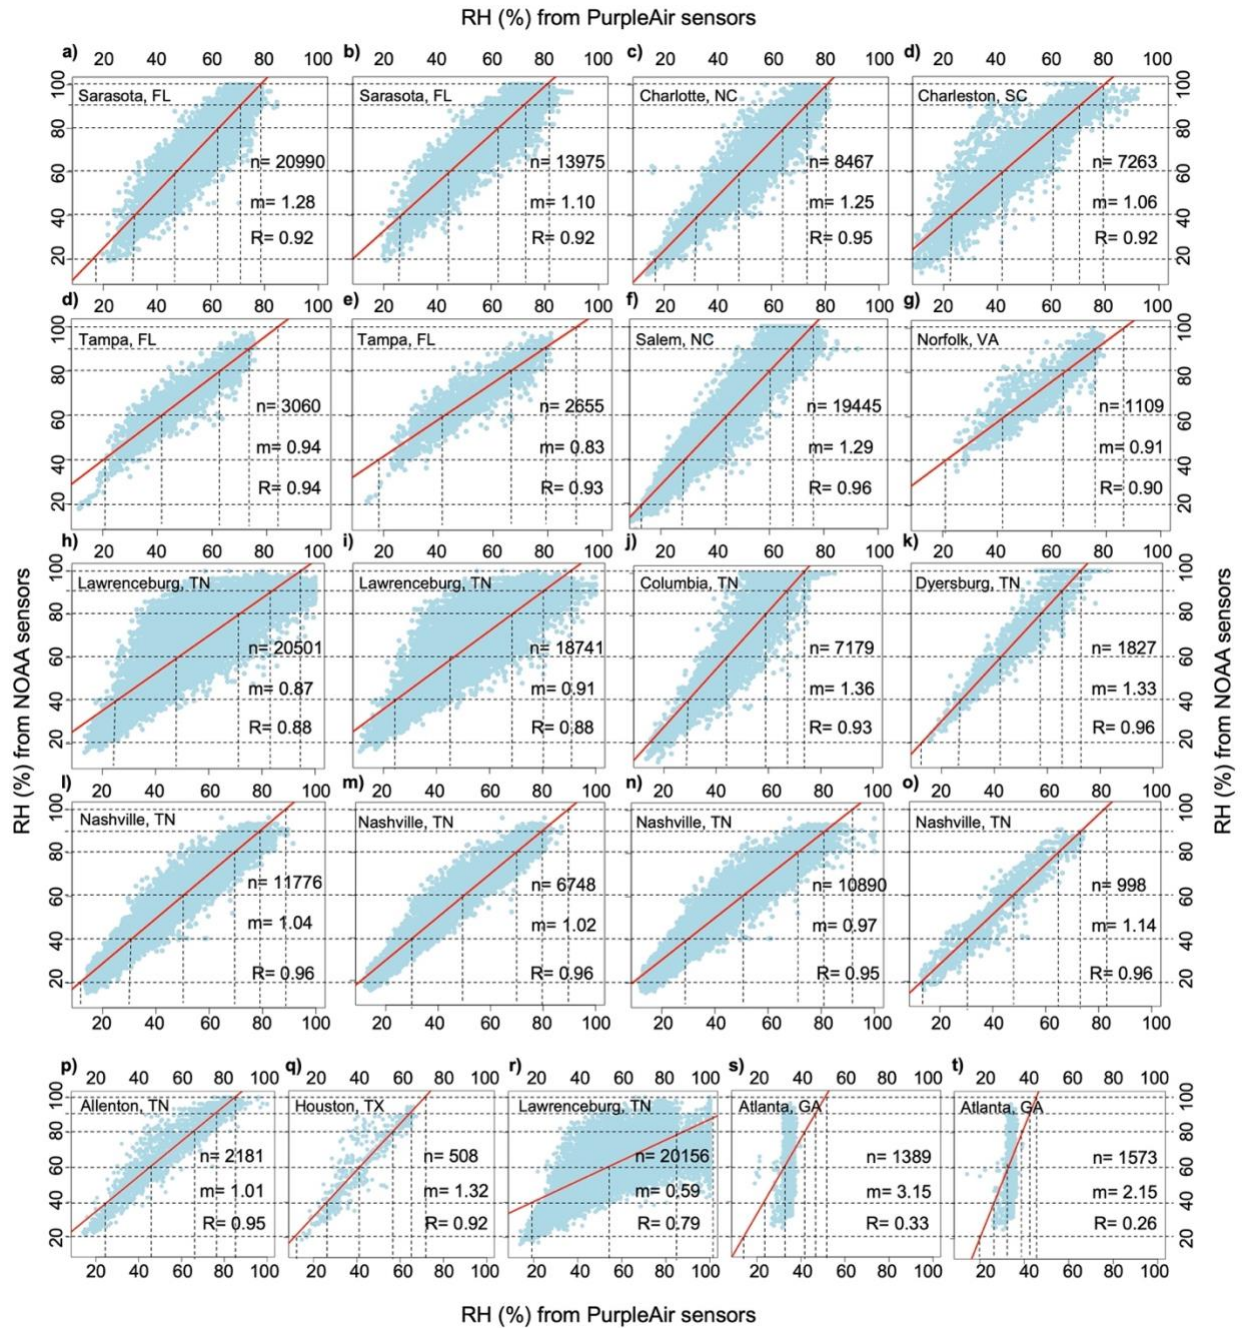

Figure S1: Correlation graphs between RH from each PA sensor and RH from the nearest NOAA sensor (average distance of ~10 miles (min: ~1.65, max: ~25.50 miles)). The 21 graphs correspond to the 21 PA sensors for the 0.5-km radius. R, n and m correspond to the estimated Pearson correlation, the number of data points and the slope of the linear regression.

Except for Figures S1-s and S1-t that present a very low Pearson correlation R, every individual PA displays a correlation R varying between 79% and 96% with 16/21 PA sensors presenting an

R equal or greater than 90%. As reported by recent studies (Tryner et al., 2020, Magi et al., 2020, Giordano et al., 2021; Barkjohn et al., 2022), PA sensors tend to report dryer humidity measurements than ambient conditions with a general difference of 10% to 20% for our sensors (Figure S2). However, Figure S1-r shows that one of our PA sensors reported more humid measurements for RH values of 80% or greater.

Moreover, the slope of the linear regression estimated for each PA sensor (Figure S1) shows that RH from Figures S1-r, S1-s and S1-t exhibit the larger bias metrics. Figure S1-r shows that RH from the PA sensor tend to underestimate ambient RH while PA sensors represented in Figures S1-s and S1-t tend to more than doubled or tripled RH values from NOAA.

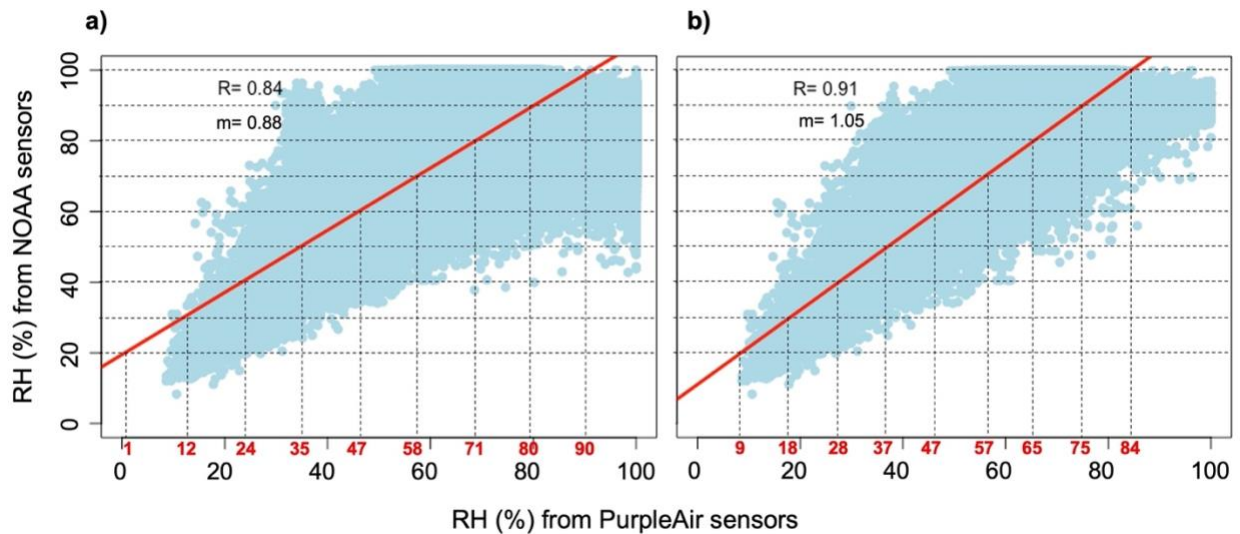

Figure S2: Correlation graphs between RH from PA sensors and RH from the nearest NOAA sensor to each PA sensor. a) All the 21 PA sensors for the 0.5-km radius, b) All PA sensors except r), s) and t) from Figure S1.

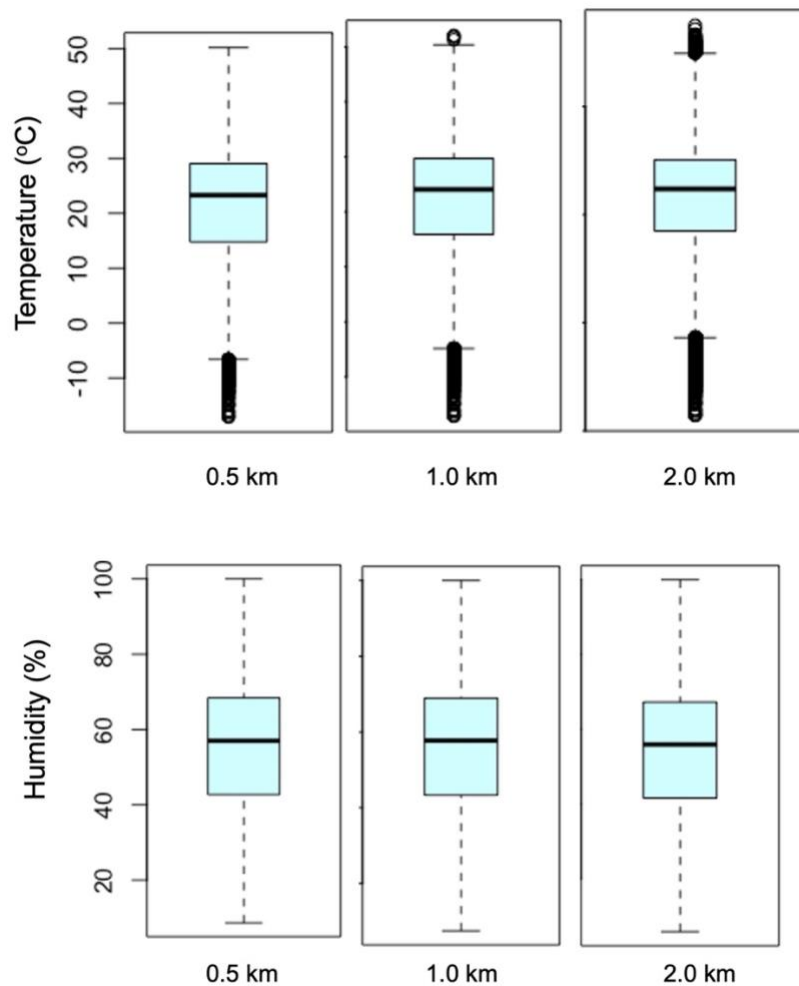

Figure S3: Distribution of RH and T from PurpleAir data for our three buffers (0.5 km, 1.0 km and 2.0 km)

### Model fit using the 1.0-km radius dataset:

Table S1: MLR model development (model fit using hourly data) for the 1.0-km radius

| Parameters     |                                                                | Model fit with hourly data |                              |                             |          |
|----------------|----------------------------------------------------------------|----------------------------|------------------------------|-----------------------------|----------|
| Models         |                                                                | R <sup>2</sup><br>(%)      | RMSE<br>(µg/m <sup>3</sup> ) | MAE<br>(µg/m <sup>3</sup> ) | R<br>(%) |
| <b>Model 1</b> | 4.3410721+0.3796856 PA <sub>i</sub>                            | 58                         | 3.85                         | 2.47                        | 76       |
| <b>Model 2</b> | 6.9941051+0.3872666 PA <sub>i</sub> -0.0489237 RH <sub>i</sub> | 60                         | 3.76                         | 2.40                        | 77       |
| <b>Model 3</b> | 1.6915454+0.3849136 PA <sub>i</sub> +0.1149728 T <sub>i</sub>  | 62                         | 3.68                         | 2.39                        | 78       |

|                 |                                                               |    |      |      |    |
|-----------------|---------------------------------------------------------------|----|------|------|----|
| <b>Model 4</b>  | $4.1204142 + 0.3907494 PA_i - 0.0405732 RH_i + 0.1050501 T_i$ | 63 | 3.61 | 2.32 | 79 |
| <b>Model Bj</b> | $5.72 + 0.524 PA_i - 0.0852 RH_i$                             | 60 | 4.40 | 2.94 | 77 |

Table S2: SSC model development for the 1.0-km radius

| Parameters                              |                                                               | Model fit with hourly data |                                      |                                     |          |
|-----------------------------------------|---------------------------------------------------------------|----------------------------|--------------------------------------|-------------------------------------|----------|
| Clusters<br>(Number of<br>observations) | Models                                                        | R <sup>2</sup><br>(%)      | RMSE<br>( $\mu\text{g}/\text{m}^3$ ) | MAE<br>( $\mu\text{g}/\text{m}^3$ ) | R<br>(%) |
| RH $\leq$ 50<br>(85616)                 | $2.782329 + 0.368994 PA_i - 0.010616 RH_i + 0.122888 T_i$     | 57                         | 3.94                                 | 2.43                                | 75       |
| RH $>$ 50<br>(152431)                   | $5.1538241 + 0.3980145 PA_i - 0.0539108 RH_i + 0.0943790 T_i$ | 67                         | 3.40                                 | 2.26                                | 82       |

### Model fit using the 2.0-km radius dataset:

Table S3: MLR model development (model fit using hourly data) for the 2.0-km radius

| Parameters      |                                                               | Model fit with hourly data |                                      |                                     |          |
|-----------------|---------------------------------------------------------------|----------------------------|--------------------------------------|-------------------------------------|----------|
| Models          |                                                               | R <sup>2</sup><br>(%)      | RMSE<br>( $\mu\text{g}/\text{m}^3$ ) | MAE<br>( $\mu\text{g}/\text{m}^3$ ) | R<br>(%) |
| <b>Model 1</b>  | $4.7265899 + 0.3763097 PA_i$                                  | 55                         | 4.30                                 | 2.72                                | 74       |
| <b>Model 2</b>  | $7.5916138 + 0.3844184 PA_i - 0.0545752 RH_i$                 | 58                         | 4.19                                 | 2.63                                | 76       |
| <b>Model 3</b>  | $1.7548043 + 0.3803865 PA_i + 0.1250425 T_i$                  | 59                         | 4.13                                 | 2.62                                | 77       |
| <b>Model 4</b>  | $4.3418026 + 0.3862249 PA_i - 0.0425548 RH_i + 0.1101893 T_i$ | 60                         | 4.06                                 | 2.55                                | 78       |
| <b>Model Bj</b> | $5.72 + 0.524 PA_i - 0.0852 RH_i$                             | 58                         | 4.84                                 | 3.10                                | 76       |

Table S4: SSC model development for the 2.0-km radius

| Parameters                              |                                                                                                 | Model fit with hourly data |                              |                             |          |
|-----------------------------------------|-------------------------------------------------------------------------------------------------|----------------------------|------------------------------|-----------------------------|----------|
| Clusters<br>(Number of<br>observations) | Models                                                                                          | R <sup>2</sup><br>(%)      | RMSE<br>(µg/m <sup>3</sup> ) | MAE<br>(µg/m <sup>3</sup> ) | R<br>(%) |
| RH ≤ 50<br>(154276)                     | 2.6452739 + 0.3676529 PA <sub>i</sub> -<br>0.0057266 RH <sub>i</sub> + 0.1303605 T <sub>i</sub> | 54                         | 4.45                         | 2.74                        | 74       |
| RH >50<br>(239734)                      | 6.0381100 + 0.3926179 PA <sub>i</sub> -<br>0.0646265 RH <sub>i</sub> + 0.0961319 T <sub>i</sub> | 65                         | 3.77                         | 2.42                        | 80       |

**Cross-validation using LGOCV for the 0.5-km radius**

Table S5: Cross-validation results – MLR models

| Parameters     |                                                                                              | Model fit with hourly data |                              |                             |          |
|----------------|----------------------------------------------------------------------------------------------|----------------------------|------------------------------|-----------------------------|----------|
| Models         |                                                                                              | R <sup>2</sup><br>(%)      | RMSE<br>(µg/m <sup>3</sup> ) | MAE<br>(µg/m <sup>3</sup> ) | R<br>(%) |
| <b>Model 1</b> | 3.6667550+0.4053418 PA <sub>i</sub>                                                          | 69                         | 3.19                         | 2.13                        | 83       |
| <b>Model 2</b> | 6.3384228+0.4143437 PA <sub>i</sub> -0.0506037 RH <sub>i</sub>                               | 71                         | 3.06                         | 2.05                        | 84       |
| <b>Model 3</b> | 1.7642336+0.4109897 PA <sub>i</sub> +0.0847196 T <sub>i</sub>                                | 71                         | 3.05                         | 2.06                        | 84       |
| <b>Model 4</b> | 4.3295358+0.4182906 PA <sub>i</sub> -0.0445768 RH <sub>i</sub> +<br>0.0752867 T <sub>i</sub> | 73                         | 2.95                         | 1.98                        | 85       |

Table S6: Cross-validation – SSC models

| Parameters                              |                                                                                             | Model fit with hourly data |                              |                             |          |
|-----------------------------------------|---------------------------------------------------------------------------------------------|----------------------------|------------------------------|-----------------------------|----------|
| Clusters<br>(Number of<br>observations) | Models                                                                                      | R <sup>2</sup><br>(%)      | RMSE<br>(µg/m <sup>3</sup> ) | MAE<br>(µg/m <sup>3</sup> ) | R<br>(%) |
| RH ≤ 50<br>(59405)                      | 2.738732 + 0.425834 PA <sub>i</sub> -<br>0.008944 RH <sub>i</sub> + 0.079210 T <sub>i</sub> | 71                         | 2.93                         | 1.86                        | 84       |

|                    |                                                           |    |      |      |    |
|--------------------|-----------------------------------------------------------|----|------|------|----|
| RH >50<br>(100243) | $7.230374 + 0.412683 PA_i - 0.085278 RH_i + 0.070655 T_i$ | 74 | 2.92 | 2.02 | 86 |
|--------------------|-----------------------------------------------------------|----|------|------|----|

Table S7: Methods evaluated to determine the optimal number of clusters using NbClust

| #  | Methods    | Number of clusters | Value Index      |
|----|------------|--------------------|------------------|
| 1  | KL         | 6                  | 12.525           |
| 2  | CH         | 5                  | 2455.144         |
| 3  | Hartigan   | 5                  | 1479.653         |
| 4  | CCC        | 2                  | 86.151           |
| 5  | Scott      | 5                  | 2750.553         |
| 6  | Marriot    | 5                  | 349227082927.000 |
| 7  | TrCovW     | 3                  | 107827250739.000 |
| 8  | TraceW     | 5                  | 135580.700       |
| 9  | Friedman   | 14                 | 52.457           |
| 10 | Rubin      | 5                  | 11.169           |
| 11 | Cindex     | 6                  | 0.253            |
| 12 | DB         | 2                  | 0.882            |
| 13 | Silhouette | 2                  | 0.384            |
| 14 | Duda       | 2                  | 0.723            |
| 15 | PseudoT2   | 2                  | 1043.876         |
| 16 | Beale      | 2                  | 0.381            |
| 17 | Ratkowsky  | 4                  | 0.379            |
| 18 | Ball       | 3                  | 195959.500       |
| 19 | PtBiserial | 5                  | 0.520            |
| 20 | Frey       | 2                  | 2.381            |
| 21 | McClain    | 2                  | 0.186            |
| 22 | Dunn       | 13                 | 0.010            |
| 23 | Hubert     | 0                  | 0.000            |
| 24 | SDindex    | 4                  | 0.203            |
| 25 | Dindex     | 0                  | 0.000            |
| 26 | SDbw       | 14                 | 0.280            |

Among all indices:

Eight (8) proposed 2 as the best number of clusters.

Two (2) proposed 3 as the best number of clusters.

Two (2) proposed 4 as the best number of clusters.  
 Seven (7) proposed 5 as the best number of clusters.  
 Two (2) proposed 6 as the best number of clusters.  
 One (1) proposed 13 as the best number of clusters.  
 Two (2) proposed 14 as the best number of clusters.

Conclusion: According to the majority rule, the best number of clusters is 2.

**Model fit using NOAA RH and T for the 0.5-km radius dataset:**

Table S8: MLR and SSC model development (model fit using hourly data) for the 0.5-km radius

| Parameters              |                                                                                               | Model development     |                              |                             |          | Sensitivity analysis  |                              |                             |          |
|-------------------------|-----------------------------------------------------------------------------------------------|-----------------------|------------------------------|-----------------------------|----------|-----------------------|------------------------------|-----------------------------|----------|
| Models                  |                                                                                               | R <sup>2</sup><br>(%) | RMSE<br>(µg/m <sup>3</sup> ) | MAE<br>(µg/m <sup>3</sup> ) | R<br>(%) | R <sup>2</sup><br>(%) | RMSE<br>(µg/m <sup>3</sup> ) | MAE<br>(µg/m <sup>3</sup> ) | R<br>(%) |
| <b>MLR</b>              | 4.4968840+0.4184462 PA <sub>i</sub> -<br>0.0353587 RH <sub>i</sub> + 0.0779764 T <sub>i</sub> | 72                    | 2.99                         | 2.01                        | 85       | 78                    | 2.28                         | 1.62                        | 88       |
| <b>SSC</b><br>(RH ≤ 50) | 2.874778+0.461934 PA <sub>i</sub> -<br>0.009394 RH <sub>i</sub> + 0.077146 T <sub>i</sub>     | 76                    | 2.72                         | 1.74                        | 87       | 85                    | 1.94                         | 1.32                        | 92       |
| <b>SSC</b><br>(RH > 50) | 5.6571930+0.4101217 PA <sub>i</sub> -<br>0.0472842 RH <sub>i</sub> + 0.0724931 T <sub>i</sub> | 72                    | 3.03                         | 2.05                        | 85       | 77                    | 2.31                         | 1.64                        | 88       |
